# Supplementary material for: Controllable fabrication of multifunctional 1D Ag-based coordination polymer@PVP nanowires
Source: Royal Society of Chemistry journal article supplement (doi:10.1039/c4nj00719k), 2014-10-14
Supplement: c4nj00719k1.pdf [file c4nj00719k1.pdf]

## Electronic Supplementary Information (ESI)

### Controllable fabrication of multifunctional 1D Ag-based coordination polymer@PVP nanowires

Bo Lv,<sup>a</sup> Xiaobo Shi,<sup>c</sup> Xiaoyan Ma,<sup>b</sup> Zhiyang Zhang,<sup>b</sup> and Kuaibing Wang\*,<sup>a</sup>

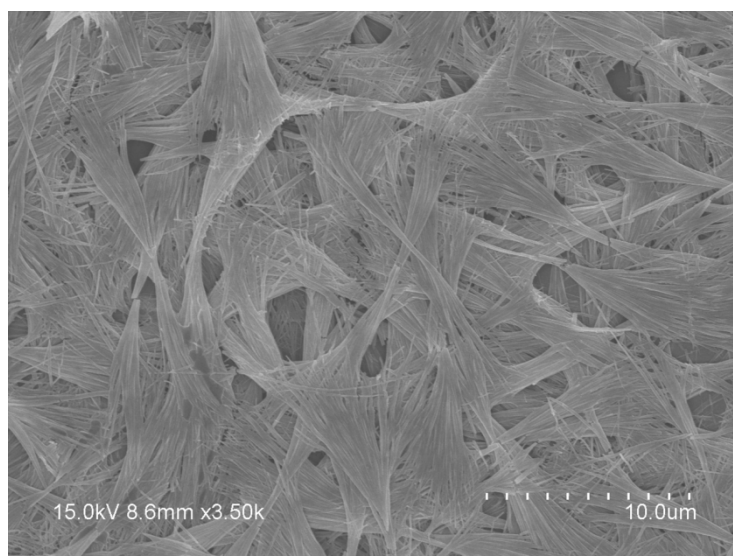

**Fig. S1** SEM image of wires-like product obtained in pure water system.

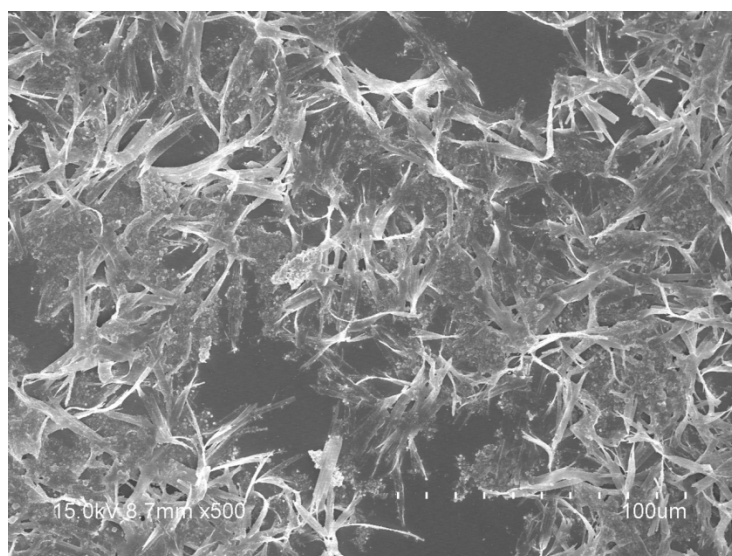

**Fig. S2** SEM image of belts-like product generated in the presence of SDS (0.1 g).

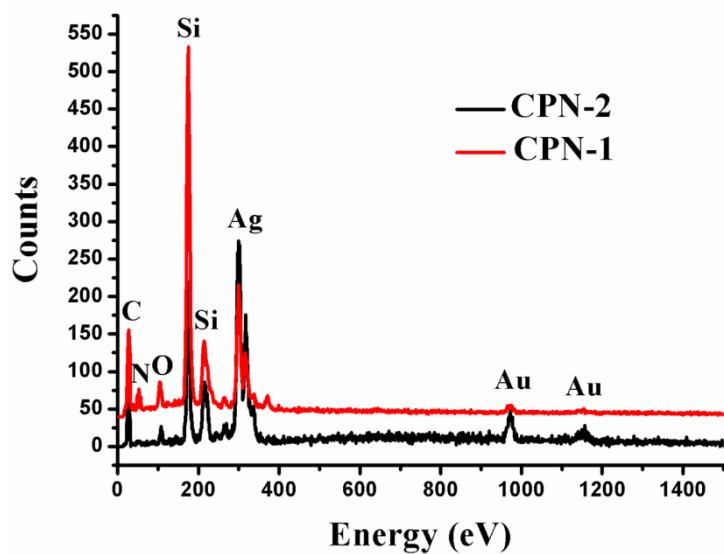

**Fig. S3** EDX spectra of as-synthesized CPN-1 and CPN-2.

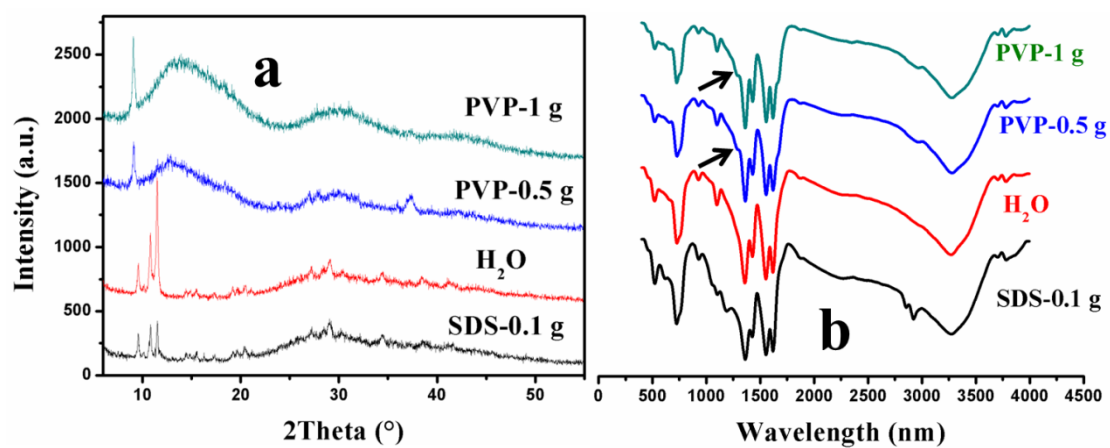

**Fig. S4** (a) XRD patterns of as-synthesized coordination polymer products by adjusting the synthetic parameters. (b) IR spectra of as-obtained coordination polymer products by adjusting the synthetic parameters (the arrow points at  $1288\text{ cm}^{-1}$ )

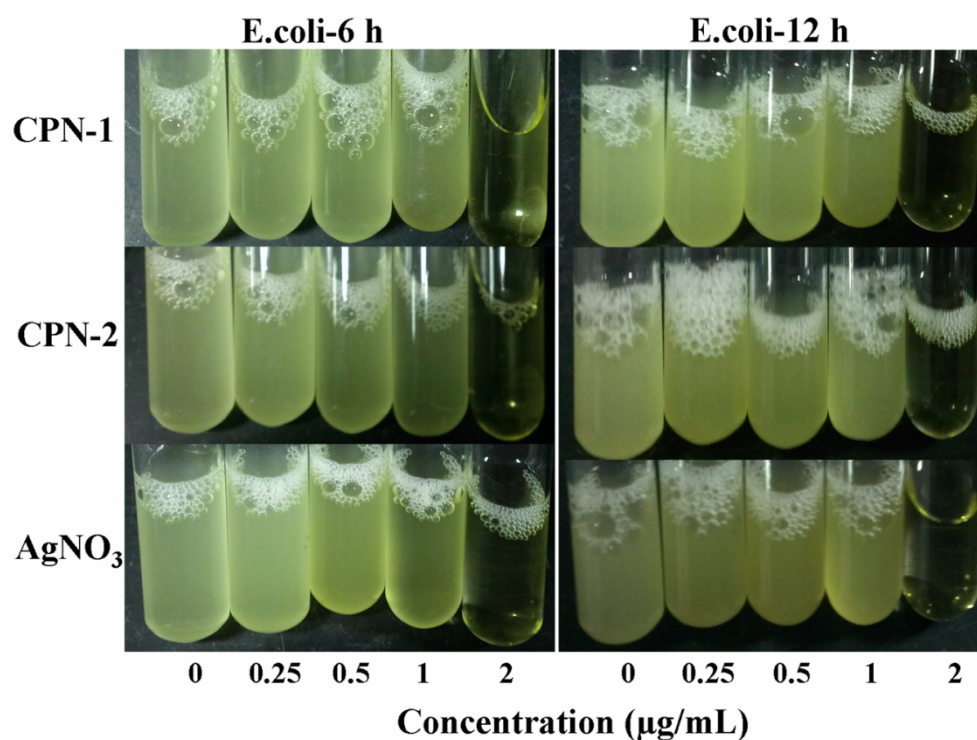

**Fig. S5** The photographs of antibacterial activities against *E. coli* of as-synthesized samples and compared AgNO<sub>3</sub>.

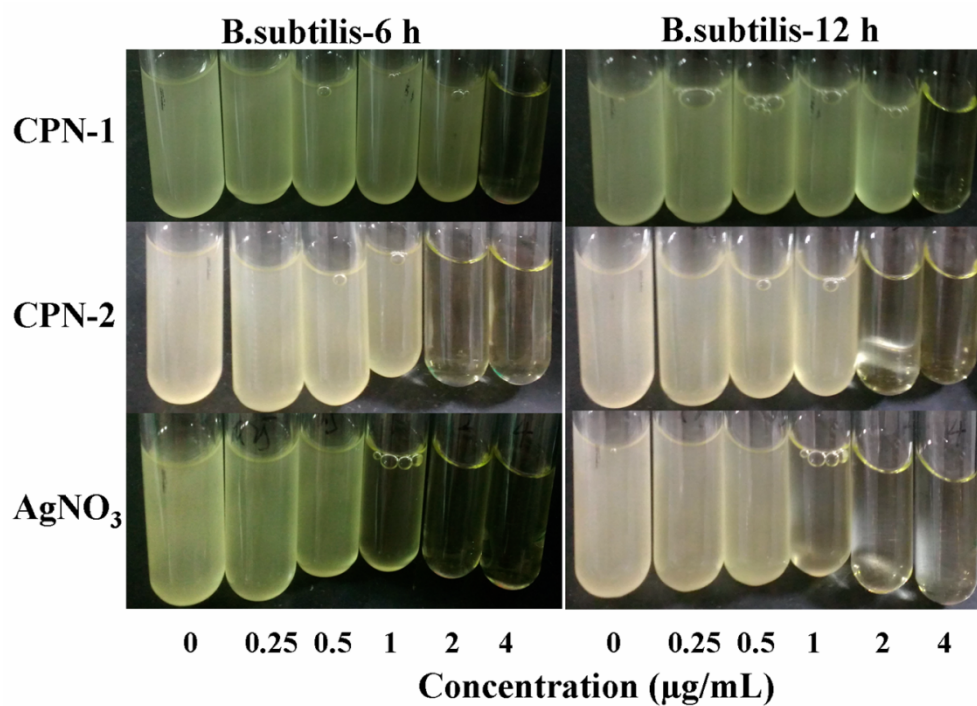

**Fig. S6** The photographs of antibacterial activities against *B. subtilis* of as-synthesized samples and compared AgNO<sub>3</sub>.

**Table S1** Elemental analyses of as-obtained coordination polymer samples using different synthetic procedures.

| Sample           | C%    | H%    | N%   |
|------------------|-------|-------|------|
| SDS-0.1 g        | 17.37 | 1.936 | 0.11 |
| H <sub>2</sub> O | 19.31 | 3.048 | 1.10 |
| PVP-0.5 g        | 20.50 | 3.187 | 1.73 |
| PVP-1 g          | 21.46 | 3.546 | 2.78 |
